# Supplementary material for: Causal Effect of Relative Carbohydrate Intake on Hypertension through Psychological Well-Being and Adiposity: A Mendelian Randomization Study
Source: MDPI journal article supplement (doi:10.3390/nu15224817), 2023-11-17

## **Supplementary Material**

### **Causal Effect of Relative Carbohydrate Intake on Hypertension through Psychological Well-Being and Adiposity: A Mendelian Randomization Study**

Chaojie Ye,<sup>1,2</sup> Lijie Kong,<sup>1,2</sup> Yiying Wang,<sup>1,2</sup> Chun Dou,<sup>1,2</sup> Min Xu,<sup>1,2</sup> Jie Zheng,<sup>1,2</sup> Ruizhi Zheng,<sup>1,2</sup> Yu Xu,<sup>1,2</sup> Mian Li,<sup>1,2</sup> Zhiyun Zhao,<sup>1,2</sup> Jieli Lu,<sup>1,2</sup> Yuhong Chen,<sup>1,2</sup> Weiqing Wang,<sup>1,2</sup> Yufang Bi,<sup>1,2</sup> Tiange Wang,<sup>1,2,\*</sup> Guang Ning<sup>1,2</sup>

#### **Author Affiliations:**

<sup>1</sup>Department of Endocrine and Metabolic Diseases, Shanghai Institute of Endocrine and Metabolic Diseases, Ruijin Hospital, Shanghai Jiao Tong University School of Medicine, Shanghai 200025, China;

<sup>2</sup>Shanghai National Clinical Research Center for Metabolic Diseases, Key Laboratory for Endocrine and Metabolic Diseases of the National Health Commission of the PR China, Shanghai Key Laboratory for Endocrine Tumor, Ruijin Hospital, Shanghai Jiao Tong University School of Medicine, Shanghai 200025, China

## Table of contents

|                                                                                                                                                                                                 |         |
|-------------------------------------------------------------------------------------------------------------------------------------------------------------------------------------------------|---------|
| <b>Supplementary Table S1.</b> Potential confounders of dietary macronutrient intake-associated SNPs under the condition of $P < 5e-08$ in the PhenoScanner database                            | .....3  |
| <b>Supplementary Table S2.</b> Summary information of SNPs used as genetic instruments for dietary macronutrient intake in this MR study                                                        | .....4  |
| <b>Supplementary Table S3.</b> Overview of the used ICD diagnosis codes to define cases with essential hypertension and controls in the Fifth release of the FinnGen Study                      | .....5  |
| <b>Supplementary Table S4.</b> UVMR estimates for the causal associations of relative carbohydrate intake, protein intake, and fat intake with hypertension                                     | .....6  |
| <b>Supplementary Table S5.</b> Directional pleiotropy test and heterogeneity test for the causal associations of relative carbohydrate intake, protein intake, and fat intake with hypertension | .....7  |
| <b>Supplementary Table S6.</b> MVMR estimates for the causal association between relative carbohydrate intake and hypertension with adjustment for relative protein intake                      | .....8  |
| <b>Supplementary Table S7.</b> UVMR estimates for the causal association between hypertension and relative carbohydrate intake                                                                  | .....9  |
| <b>Supplementary Table S8.</b> MR Steiger test of directionality in the MR analysis for the effect of hypertension on relative carbohydrate intake                                              | .....10 |
| <b>Supplementary Table S9.</b> Directional pleiotropy test and heterogeneity test for the causal association between hypertension and relative carbohydrate intake                              | .....11 |
| <b>Supplementary Table S10.</b> UVMR estimates for the causal association between each mediator and relative carbohydrate intake                                                                | .....12 |
| <b>Supplementary Table S11.</b> Directional pleiotropy test and heterogeneity test for the causal association between relative carbohydrate intake and each mediator                            | .....14 |
| <b>Supplementary Table S12.</b> UVMR estimates for the causal association between each mediator and hypertension                                                                                | .....15 |
| <b>Supplementary Table S13.</b> MVMR estimates for the causal association between each mediator and hypertension with adjustment for relative carbohydrate intake                               | .....18 |
| <b>Supplementary Figure S1.</b> Flow chart of the present MR study                                                                                                                              | .....20 |

**Supplementary Table S1. Potential confounders of dietary macronutrient intake-associated SNPs under the condition of  $P < 5e-08$  in the PhenoScanner database**

| <b>Exposure</b>              | <b>Excluded SNP</b> | <b>Trait</b>                                                                                                                                                                                                                                                                                                                                   |
|------------------------------|---------------------|------------------------------------------------------------------------------------------------------------------------------------------------------------------------------------------------------------------------------------------------------------------------------------------------------------------------------------------------|
| Relative carbohydrate intake | rs10433500          | Alcohol intake frequency, Ever smoked, Past tobacco smoking, Smoking status: previous, Types of physical activity in last 4 weeks: other exercises                                                                                                                                                                                             |
|                              | rs1104608           | Alcohol intake frequency                                                                                                                                                                                                                                                                                                                       |
|                              | rs36123991          | Alcohol intake frequency, Qualifications: college or university degree                                                                                                                                                                                                                                                                         |
|                              | rs7190396           | Alcohol intake frequency, Average weekly beer plus cider intake, Average weekly red wine intake, Usual walking pace                                                                                                                                                                                                                            |
|                              | rs838144            | Alcohol intake frequency                                                                                                                                                                                                                                                                                                                       |
| Relative protein intake      | rs13146907          | Alcohol intake frequency                                                                                                                                                                                                                                                                                                                       |
|                              | rs55872725          | Alcohol intake frequency, Average weekly beer plus cider intake, Usual walking pace                                                                                                                                                                                                                                                            |
|                              | rs780094            | Alcohol intake frequency, Alcohol intake versus 10 years previously                                                                                                                                                                                                                                                                            |
| Relative fat intake          | rs1229984           | Alcohol consumption, Alcohol consumption drinkers vs non-drinkers, Alcohol consumption drinks per week, Alcohol drinker status: never, Alcohol intake frequency, Alcohol intake versus 10 years previously, Average weekly beer plus cider intake, Average weekly red wine intake, Drinking intensity in ever drinkers, Former alcohol drinker |

Abbreviation: SNP, single nucleotide polymorphism.

**Supplementary Table S2. Summary information of SNPs used as genetic instruments for dietary macronutrient intake in this MR study**

| SNP                                          | EA | EAF    | $\beta$  | SE      | P value  |
|----------------------------------------------|----|--------|----------|---------|----------|
| <b>SNPs for relative carbohydrate intake</b> |    |        |          |         |          |
| rs10206338                                   | A  | 0.5724 | -0.01577 | 0.00326 | 1.52e-08 |
| rs10510554                                   | T  | 0.4362 | 0.01942  | 0.00289 | 2.94e-12 |
| rs10962121                                   | T  | 0.4791 | -0.01519 | 0.00369 | 3.40e-08 |
| rs2472297                                    | T  | 0.2055 | -0.01795 | 0.00388 | 3.73e-08 |
| rs429358                                     | T  | 0.8592 | -0.02698 | 0.00279 | 3.49e-12 |
| rs7012637                                    | A  | 0.4915 | 0.01734  | 0.00278 | 4.68e-10 |
| rs8097672                                    | A  | 0.847  | 0.02346  | 0.00278 | 1.95e-09 |
| rs10433500 <sup>a</sup>                      | A  | 0.6301 | 0.01608  | 0.00281 | 1.96e-08 |
| rs1104608 <sup>a</sup>                       | C  | 0.4184 | 0.01847  | 0.00391 | 1.74e-10 |
| rs36123991 <sup>a</sup>                      | T  | 0.1858 | 0.0213   | 0.00275 | 8.24e-09 |
| rs7190396 <sup>a</sup>                       | T  | 0.5985 | 0.01781  | 0.00286 | 2.39e-10 |
| rs838144 <sup>a</sup>                        | T  | 0.5342 | -0.02323 | 0.0048  | 3.26e-17 |
| rs9987289 <sup>†</sup>                       | A  | 0.0904 | -0.02623 | 0.00275 | 4.64e-08 |
| <b>SNPs for relative protein intake</b>      |    |        |          |         |          |
| rs838133                                     | A  | 0.425  | -0.03182 | 0.00301 | 4.52e-26 |
| rs445551                                     | A  | 0.3168 | 0.01919  | 0.00339 | 1.49e-08 |
| rs1603978                                    | A  | 0.6939 | 0.01917  | 0.00299 | 1.35e-10 |
| rs1461729                                    | A  | 0.0978 | 0.03183  | 0.00459 | 4.09e-12 |
| rs55872725 <sup>a</sup>                      | T  | 0.4002 | 0.01779  | 0.0028  | 2.09e-10 |
| rs780094 <sup>a</sup>                        | T  | 0.3976 | 0.01752  | 0.00282 | 5.58e-10 |
| rs13146907 <sup>a</sup>                      | A  | 0.6252 | -0.0219  | 0.00284 | 1.24e-14 |
| <b>SNPs for relative fat intake</b>          |    |        |          |         |          |
| rs33988101                                   | T  | 0.4993 | -0.0294  | 0.00276 | 1.66e-26 |
| rs57193069                                   | A  | 0.5526 | -0.01574 | 0.0028  | 1.80e-08 |
| rs7012814                                    | A  | 0.4921 | -0.0189  | 0.00278 | 1.12e-11 |
| rs1229984 <sup>a</sup>                       | T  | 0.0475 | 0.09777  | 0.00886 | 2.64e-28 |
| rs9927317 <sup>†</sup>                       | C  | 0.606  | -0.0242  | 0.0035  | 4.77e-12 |
| rs429358 <sup>†</sup>                        | T  | 0.8592 | 0.02379  | 0.00388 | 8.65e-10 |

<sup>a</sup> Excluded for the associations with potential confounders as shown in Supplementary Table 2.

<sup>†</sup> Excluded after LD clumping (LD  $r^2 < 0.001$  within 10,000 kb).

Abbreviations: EA, effect allele; EAF, effect allele frequency; LD, linkage disequilibrium; MR, Mendelian randomization; SE, standard error; SNP, single nucleotide polymorphism.

**Supplementary Table S3. Overview of the used ICD diagnosis codes to define cases with essential hypertension and controls in the Fifth release of the FinnGen Study**

| <b>Diagnostic classification code</b> | <b>Case</b><br>(Participants <b>with</b> at least one of the following diagnoses according to the electronic health registries) | <b>Control</b><br>(Participants <b>without</b> any of the following diagnoses according to the electronic health registries) |
|---------------------------------------|---------------------------------------------------------------------------------------------------------------------------------|------------------------------------------------------------------------------------------------------------------------------|
| ICD-10                                | I10                                                                                                                             | I10, I11, I12, I13, I15, I674                                                                                                |
| ICD-9                                 | 4039A, 4019X                                                                                                                    | 4019X, 4029A, 4029B, 4039A, 4040A, 4059A, 4059B, 4372A, 4059X                                                                |
| ICD-8                                 | 401, 402, 403, 404                                                                                                              | 400, 401, 402, 403, 404                                                                                                      |

Abbreviation: ICD, International Classification of Diseases.

**Supplementary Table S4. UVMR estimates for the causal associations of relative carbohydrate intake, protein intake, and fat intake with hypertension**

| UVMR analysis                | Method                 | No. of SNP | F statistic | OR (95% CI) <sup>a</sup> | P value  |
|------------------------------|------------------------|------------|-------------|--------------------------|----------|
| Relative carbohydrate intake |                        |            |             |                          |          |
| FinnGen                      | IVW                    | 7          | 50          | 0.43 (0.21, 0.86)        | 0.017    |
|                              | Weighted median        |            |             | 0.36 (0.19, 0.68)        | 0.002    |
|                              | Weighted mode          |            |             | 0.30 (0.14, 0.64)        | 0.022    |
|                              | MR-Egger               |            |             | 0.10 (0.002, 4.47)       | 0.29     |
|                              | MR-PRESSO (1 outlier)  |            |             | 0.33 (0.21, 0.50)        | 0.004    |
| UK Biobank                   | IVW                    | 7          | 50          | 0.76 (0.32, 1.80)        | 0.54     |
|                              | Weighted median        |            |             | 0.84 (0.53, 1.33)        | 0.45     |
|                              | Weighted mode          |            |             | 0.82 (0.43, 1.55)        | 0.56     |
|                              | MR-Egger               |            |             | 0.42 (0.003, 63.44)      | 0.75     |
|                              | MR-PRESSO (3 outliers) |            |             | 0.62 (0.37, 1.05)        | 0.17     |
| Relative protein intake      |                        |            |             |                          |          |
| FinnGen                      | IVW                    | 3          | 64          | 0.50 (0.32, 0.80)        | 0.004    |
|                              | Weighted median        |            |             | 0.52 (0.30, 0.87)        | 0.014    |
|                              | Weighted mode          |            |             | 0.51 (0.28, 0.94)        | 0.16     |
|                              | MR-Egger               |            |             | 1.33 (0.16, 11.27)       | 0.84     |
|                              | MR-PRESSO <sup>†</sup> | NA         | NA          | NA                       | NA       |
| UK Biobank                   | IVW                    | 4          | 58          | 0.72 (0.28, 1.86)        | 0.50     |
|                              | Weighted median        |            |             | 0.62 (0.40, 0.98)        | 0.042    |
|                              | Weighted mode          |            |             | 0.45 (0.31, 0.65)        | 0.024    |
|                              | MR-Egger               |            |             | 0.69 (0.006, 76.41)      | 0.89     |
|                              | MR-PRESSO (2 outliers) |            |             | 0.73 (0.67, 0.81)        | 0.099    |
| Relative fat intake          |                        |            |             |                          |          |
| FinnGen                      | IVW                    | 3          | 64          | 0.77 (0.26, 2.26)        | 0.63     |
|                              | Weighted median        |            |             | 0.74 (0.40, 1.38)        | 0.34     |
|                              | Weighted mode          |            |             | 0.49 (0.25, 0.98)        | 0.18     |
|                              | MR-Egger               |            |             | 0.048 (0.007, 0.33)      | 0.20     |
|                              | MR-PRESSO <sup>†</sup> | NA         | NA          | NA                       | NA       |
| UK Biobank                   | IVW                    | 3          | 64          | 0.46 (0.11, 1.97)        | 0.30     |
|                              | Weighted median        |            |             | 0.29 (0.20, 0.44)        | 2.85e-09 |
|                              | Weighted mode          |            |             | 0.29 (0.19, 0.43)        | 0.028    |
|                              | MR-Egger               |            |             | 0.023 (0.000, 3.10)      | 0.37     |
|                              | MR-PRESSO <sup>†</sup> | NA         | NA          | NA                       | NA       |

<sup>a</sup> Causal estimates of odds for hypertension per 1-SD increase in relative carbohydrate, protein, or fat intake.

<sup>†</sup> Not available for not enough instrumental variables.

Abbreviations: CI, confidence interval; IVW, inverse-variance weighted; OR, odds ratio; PRESSO, pleiotropy residual sum and outlier; SD, standard deviation; SNP, single nucleotide polymorphism; UVMR, univariable Mendelian randomization.

**Supplementary Table S5. Directional pleiotropy test and heterogeneity test for the causal associations of relative carbohydrate intake, protein intake, and fat intake with hypertension**

| UVMR analysis                       | Directional pleiotropy test |       |         | Heterogeneity test |      |          |
|-------------------------------------|-----------------------------|-------|---------|--------------------|------|----------|
|                                     | Egger intercept             | SE    | P value | Q statistic        | Q df | P value  |
| <b>Relative carbohydrate intake</b> |                             |       |         |                    |      |          |
| FinnGen                             | 0.028                       | 0.037 | 0.48    | 15.92              | 6    | 0.014    |
| UK Biobank                          | 0.012                       | 0.048 | 0.82    | 57.00              | 6    | 1.83e-10 |
| <b>Relative protein intake</b>      |                             |       |         |                    |      |          |
| FinnGen                             | -0.028                      | 0.030 | 0.53    | 1.36               | 2    | 0.51     |
| UK Biobank                          | 0.001                       | 0.061 | 0.99    | 32.93              | 3    | 3.33e-07 |
| <b>Relative fat intake</b>          |                             |       |         |                    |      |          |
| FinnGen                             | 0.064                       | 0.022 | 0.21    | 8.63               | 2    | 0.013    |
| UK Biobank                          | 0.068                       | 0.055 | 0.43    | 38.60              | 2    | 4.16e-09 |

Abbreviations: SE, standard error; UVMR, univariable Mendelian randomization.

**Supplementary Table S6. MVMR estimates for the causal association between relative carbohydrate intake and hypertension with adjustment for relative protein intake**

| MVMR analysis                                             | Method      | OR (95% CI) <sup>a</sup> | P value  | No. of SNP | F statistic | Heterogeneity test |          | Directional pleiotropy test |       |         |
|-----------------------------------------------------------|-------------|--------------------------|----------|------------|-------------|--------------------|----------|-----------------------------|-------|---------|
|                                                           |             |                          |          |            |             | Q statistic        | P value  | Egger intercept             | SE    | P value |
| Relative carbohydrate intake, adjusted for protein intake |             |                          |          |            |             |                    |          |                             |       |         |
| FinnGen                                                   | MV-IVW      | 0.22 (0.059, 0.78)       | 0.020    | 9          | 33          | 22.74              | 0.002    | 0.007                       | 0.026 | 0.80    |
|                                                           | MVMR-median | 0.16 (0.046, 0.55)       | 0.004    |            |             |                    |          |                             |       |         |
|                                                           | MVMR-Egger  | 0.16 (0.012, 2.22)       | 0.17     |            |             |                    |          |                             |       |         |
|                                                           | MVMR-Lasso  | 0.13 (0.048, 0.38)       | 1.30e-04 |            |             |                    |          |                             |       |         |
| UK Biobank                                                | MV-IVW      | 0.45 (0.098, 2.12)       | 0.32     | 9          | 33          | 75.25              | 1.27e-13 | -0.006                      | 0.031 | 0.83    |
|                                                           | MVMR-median | 0.40 (0.14, 1.18)        | 0.098    |            |             |                    |          |                             |       |         |
|                                                           | MVMR-Egger  | 0.60 (0.026, 13.83)      | 0.75     |            |             |                    |          |                             |       |         |
|                                                           | MVMR-Lasso  | 0.28 (0.14, 0.58)        | 5.41e-04 |            |             |                    |          |                             |       |         |
| Combined effect (fixed model)                             | MV-IVW      | 0.29 (0.11, 0.79)        | 0.015    | /          | /           | /                  | /        | /                           | /     | /       |
|                                                           | MVMR-median | 0.27 (0.12, 0.61)        | 0.002    |            |             |                    |          |                             |       |         |
|                                                           | MVMR-Egger  | 0.28 (0.037, 2.07)       | 0.21     |            |             |                    |          |                             |       |         |
|                                                           | MVMR-Lasso  | 0.22 (0.12, 0.40)        | 4.89e-07 |            |             |                    |          |                             |       |         |

<sup>a</sup> Causal estimates of odds for hypertension per 1-SD increase in relative carbohydrate intake.

Abbreviations: CI, confidence interval; MV-IVW, multivariable inverse-variance weighted; MVMR, multivariable Mendelian randomization; OR, odds ratio; SD, standard deviation; SE, standard error; SNP, single nucleotide polymorphism.



**Supplementary Table S7. UVMR estimates for the causal association between hypertension and relative carbohydrate intake**

| Method                                              | No. of SNP | F statistic | $\beta$ (95% CI) <sup>a</sup> | P value |
|-----------------------------------------------------|------------|-------------|-------------------------------|---------|
| <b>Hypertension on relative carbohydrate intake</b> |            |             |                               |         |
| IVW                                                 | 34         | 49          | 0.001 (-0.017, 0.020)         | 0.88    |
| Weighted median                                     |            |             | 0.004 (-0.016, 0.024)         | 0.67    |
| Weighted mode                                       |            |             | 0.009 (-0.028, 0.046)         | 0.65    |
| MR-Egger                                            |            |             | 0.030 (-0.040, 0.099)         | 0.41    |
| MR-PRESSO (1 outlier)                               |            |             | 0.007 (-0.006, 0.019)         | 0.30    |

<sup>a</sup> Causal estimate of change in SDs of relative carbohydrate intake associated with hypertension.

Abbreviations: CI, confidence interval; IVW, inverse-variance weighted; MR, Mendelian randomization; PRESSO, pleiotropy residual sum and outlier; SD, standard deviation; SNP, single nucleotide polymorphism; UVMR, univariable Mendelian randomization.

**Supplementary Table S8. MR Steiger test of directionality in the MR analysis for the effect of hypertension on relative carbohydrate intake**

| <b>Exposure</b> | <b>Outcome</b>               | <b>r<sup>2</sup> exposure</b> | <b>r<sup>2</sup> outcome</b> | <b>Correct causal direction</b> | <b>Steiger P value</b> |
|-----------------|------------------------------|-------------------------------|------------------------------|---------------------------------|------------------------|
| Hypertension    | Relative carbohydrate intake | 0.336                         | 6.51e-04                     | True                            | 0.00                   |

Abbreviation: MR, Mendelian randomization.

**Supplementary Table S9. Directional pleiotropy test and heterogeneity test for the causal association between hypertension and relative carbohydrate intake**

| <b>Exposure</b> | <b>Outcome</b>               | <b>Directional pleiotropy test</b> |           |                | <b>Heterogeneity test</b> |             |                |
|-----------------|------------------------------|------------------------------------|-----------|----------------|---------------------------|-------------|----------------|
|                 |                              | <b>Egger intercept</b>             | <b>SE</b> | <b>P value</b> | <b>Q statistic</b>        | <b>Q df</b> | <b>P value</b> |
| Hypertension    | Relative carbohydrate intake | -0.002                             | 0.003     | 0.41           | 53.09                     | 33          | 0.015          |

Abbreviation: SE, standard error.

**Supplementary Table S10. UVMR estimates for the causal association between each mediator and relative carbohydrate intake**

| Mediator                                      | Method                 | No. of SNP | $\beta$ (95% CI) <sup>a</sup> | P value | Directional pleiotropy test |       |         | Heterogeneity test |      |          |
|-----------------------------------------------|------------------------|------------|-------------------------------|---------|-----------------------------|-------|---------|--------------------|------|----------|
|                                               |                        |            |                               |         | Egger intercept             | SE    | P value | Q statistic        | Q df | P value  |
| Each mediator on relative carbohydrate intake |                        |            |                               |         |                             |       |         |                    |      |          |
| Positive affect                               | IVW                    | 93         | 0.034 (-0.076, 0.143)         | 0.55    | -0.001                      | 0.002 | 0.61    | 225.93             | 92   | 2.89e-13 |
|                                               | Weighted median        |            | 0.030 (-0.083, 0.144)         | 0.60    |                             |       |         |                    |      |          |
|                                               | Weighted mode          |            | -0.017 (-0.247, 0.213)        | 0.88    |                             |       |         |                    |      |          |
|                                               | MR-Egger               |            | 0.149 (-0.302, 0.600)         | 0.52    |                             |       |         |                    |      |          |
|                                               | MR-PRESSO (3 outliers) |            | 0.047 (-0.050, 0.143)         | 0.35    |                             |       |         |                    |      |          |
| Life satisfaction                             | IVW                    | 68         | 0.056 (-0.063, 0.174)         | 0.36    | 0.001                       | 0.003 | 0.62    | 148.87             | 67   | 3.72e-08 |
|                                               | Weighted median        |            | 0.029 (-0.096, 0.154)         | 0.65    |                             |       |         |                    |      |          |
|                                               | Weighted mode          |            | 0.057 (-0.251, 0.364)         | 0.72    |                             |       |         |                    |      |          |
|                                               | MR-Egger               |            | -0.089 (-0.673, 0.495)        | 0.77    |                             |       |         |                    |      |          |
|                                               | MR-PRESSO (2 outliers) |            | 0.100 (-0.009, 0.210)         | 0.077   |                             |       |         |                    |      |          |
| Neuroticism                                   | IVW                    | 124        | 0.015 (-0.062, 0.091)         | 0.71    | -0.001                      | 0.002 | 0.45    | 314.17             | 123  | 1.10e-18 |
|                                               | Weighted median        |            | -0.033 (-0.113, 0.048)        | 0.43    |                             |       |         |                    |      |          |
|                                               | Weighted mode          |            | -0.092 (-0.275, 0.090)        | 0.32    |                             |       |         |                    |      |          |
|                                               | MR-Egger               |            | 0.136 (-0.187, 0.459)         | 0.41    |                             |       |         |                    |      |          |
|                                               | MR-PRESSO (4 outliers) |            | -0.008 (-0.078, 0.061)        | 0.81    |                             |       |         |                    |      |          |
| Depressive symptoms                           | IVW                    | 116        | -0.020 (-0.140, 0.101)        | 0.75    | -0.001                      | 0.002 | 0.57    | 277.09             | 115  | 2.12e-05 |
|                                               | Weighted median        |            | -0.093 (-0.228, 0.041)        | 0.17    |                             |       |         |                    |      |          |
|                                               | Weighted mode          |            | -0.172 (-0.508, 0.164)        | 0.32    |                             |       |         |                    |      |          |
|                                               | MR-Egger               |            | 0.124 (-0.391, 0.639)         | 0.64    |                             |       |         |                    |      |          |
|                                               | MR-PRESSO (3 outliers) |            | -0.042 (-0.152, 0.068)        | 0.45    |                             |       |         |                    |      |          |
| MDD                                           | IVW                    | 44         | -0.002 (-0.046, 0.043)        | 0.94    | -0.002                      | 0.004 | 0.56    | 92.18              | 43   | 1.94e-05 |
|                                               | Weighted median        |            | -0.019 (-0.067, 0.028)        | 0.43    |                             |       |         |                    |      |          |
|                                               | Weighted mode          |            | -0.054 (-0.146, 0.037)        | 0.25    |                             |       |         |                    |      |          |
|                                               | MR-Egger               |            | 0.069 (-0.171, 0.310)         | 0.57    |                             |       |         |                    |      |          |
|                                               | MR-PRESSO (2 outliers) |            | -0.008 (-0.047, 0.030)        | 0.67    |                             |       |         |                    |      |          |
| BMI                                           | IVW                    | 68         | -0.019 (-0.071, 0.034)        | 0.48    | -0.004                      | 0.002 | 0.057   | 239.94             | 67   | 2.66e-21 |
|                                               | Weighted median        |            | 0.015 (-0.033, 0.063)         | 0.54    |                             |       |         |                    |      |          |
|                                               | Weighted mode          |            | 0.026 (-0.049, 0.100)         | 0.50    |                             |       |         |                    |      |          |
|                                               | MR-Egger               |            | 0.122 (-0.030, 0.274)         | 0.12    |                             |       |         |                    |      |          |

|     |                         |     |                         |          |        |       |      |        |     |          |
|-----|-------------------------|-----|-------------------------|----------|--------|-------|------|--------|-----|----------|
|     | MR-PRESSO (7 outliers)  |     | -0.035 (-0.075, 0.006)  | 0.10     |        |       |      |        |     |          |
| WHR | IVW                     | 28  | -0.050 (-0.123, 0.023)  | 0.18     | 0.002  | 0.004 | 0.57 | 69.96  | 27  | 1.14e-05 |
|     | Weighted median         |     | -0.009 (-0.082, 0.063)  | 0.81     |        |       |      |        |     |          |
|     | Weighted mode           |     | -0.001 (-0.125, 0.124)  | 0.99     |        |       |      |        |     |          |
|     | MR-Egger                |     | -0.515 (-0.801, -0.228) | 0.002    |        |       |      |        |     |          |
|     | MR-PRESSO (1 outlier)   |     | -0.013 (-0.071, 0.045)  | 0.67     |        |       |      |        |     |          |
|     |                         |     |                         |          |        |       |      |        |     |          |
| WC  | IVW                     | 41  | 0.003 (-0.052, 0.059)   | 0.91     | -0.002 | 0.003 | 0.39 | 98.64  | 40  | 7.34e-07 |
|     | Weighted median         |     | 0.015 (-0.044, 0.073)   | 0.62     |        |       |      |        |     |          |
|     | Weighted mode           |     | 0.065 (-0.029, 0.159)   | 0.18     |        |       |      |        |     |          |
|     | MR-Egger                |     | 0.086 (-0.110, 0.283)   | 0.40     |        |       |      |        |     |          |
|     | MR-PRESSO (3 outliers)  |     | -0.019 (-0.070, 0.032)  | 0.48     |        |       |      |        |     |          |
|     |                         |     |                         |          |        |       |      |        |     |          |
| HC  | IVW                     | 52  | -0.029 (-0.077, 0.019)  | 0.24     | 0.003  | 0.002 | 0.13 | 147.13 | 51  | 2.93e-11 |
|     | Weighted median         |     | 0.005 (-0.045, 0.056)   | 0.83     |        |       |      |        |     |          |
|     | Weighted mode           |     | 0.043 (-0.088, 0.175)   | 0.52     |        |       |      |        |     |          |
|     | MR-Egger                |     | -0.134 (-0.277, 0.009)  | 0.072    |        |       |      |        |     |          |
|     | MR-PRESSO (3 outliers)  |     | -0.000 (-0.043, 0.043)  | 0.99     |        |       |      |        |     |          |
|     |                         |     |                         |          |        |       |      |        |     |          |
| BF% | IVW                     | 378 | -0.079 (-0.114, -0.044) | 7.58e-06 | 0.000  | 0.001 | 0.57 | 798.36 | 377 | 2.18e-32 |
|     | Weighted median         |     | -0.052 (-0.090, -0.013) | 0.008    |        |       |      |        |     |          |
|     | Weighted mode           |     | -0.011 (-0.142, 0.120)  | 0.87     |        |       |      |        |     |          |
|     | MR-Egger                |     | -0.110 (-0.222, 0.002)  | 0.054    |        |       |      |        |     |          |
|     | MR-PRESSO (13 outliers) |     | -0.073 (-0.103, -0.043) | 2.55e-06 |        |       |      |        |     |          |
|     |                         |     |                         |          |        |       |      |        |     |          |

<sup>a</sup> Causal estimates of changes in SDs of relative carbohydrate intake associated with each psychological well-being indicator or each 1-SD increase in each adiposity trait.

Abbreviations: BF%, body fat percentage; BMI, body mass index; CI, confidence interval; HC, hip circumference; IVW, inverse-variance weighted; MDD, major depressive disorder; MR, Mendelian randomization; OR, odds ratio; PRESSO, pleiotropy residual sum and outlier; SD, standard deviation; SE, standard error; SNP, single nucleotide polymorphism; UVMR, univariable Mendelian randomization; WC, waist circumference; WHR, waist-to-hip ratio.

**Supplementary Table S11. Directional pleiotropy test and heterogeneity test for the causal association between relative carbohydrate intake and each mediator**

| <b>Mediator</b>     | <b>Directional pleiotropy test</b> |           |                | <b>Heterogeneity test</b> |             |                |
|---------------------|------------------------------------|-----------|----------------|---------------------------|-------------|----------------|
|                     | <b>Egger intercept</b>             | <b>SE</b> | <b>P value</b> | <b>Q statistic</b>        | <b>Q df</b> | <b>P value</b> |
| Positive affect     | -0.001                             | 0.008     | 0.90           | 7.44                      | 4           | 0.11           |
| Life satisfaction   | -0.001                             | 0.008     | 0.87           | 6.76                      | 4           | 0.15           |
| Neuroticism         | -0.010                             | 0.006     | 0.23           | 4.36                      | 4           | 0.36           |
| Depressive symptoms | 0.000                              | 0.007     | 0.96           | 9.87                      | 4           | 0.043          |
| MDD                 | -0.015                             | 0.011     | 0.22           | 7.94                      | 6           | 0.24           |
| BMI                 | 0.015                              | 0.025     | 0.61           | 13.18                     | 4           | 0.010          |
| WHR                 | 0.005                              | 0.014     | 0.76           | 0.32                      | 4           | 0.99           |
| WC                  | 0.007                              | 0.015     | 0.66           | 3.52                      | 4           | 0.47           |
| HC                  | 0.003                              | 0.021     | 0.91           | 6.12                      | 4           | 0.19           |
| BF%                 | 0.010                              | 0.019     | 0.63           | 158.39                    | 6           | 1.30e-31       |

Abbreviations: BF%, body fat percentage; BMI, body mass index; HC, hip circumference; MDD, major depressive disorder; SE, standard error; WC, waist circumference; WHR, waist-to-hip ratio.

**Supplementary Table S12. UVMR estimates for the causal association between each mediator and hypertension**

| UVMR analysis       | Method                 | No. of SNP | OR (95% CI) <sup>a</sup> | P value  |
|---------------------|------------------------|------------|--------------------------|----------|
| Positive affect     |                        |            |                          |          |
| FinnGen             | IVW                    | 93         | 0.55 (0.40, 0.75)        | 1.58e-04 |
|                     | Weighted median        |            | 0.60 (0.41, 0.88)        | 0.008    |
|                     | Weighted mode          |            | 0.91 (0.39, 2.11)        | 0.82     |
|                     | MR-Egger               |            | 0.17 (0.045, 0.63)       | 0.009    |
|                     | MR-PRESSO (2 outliers) |            | 0.55 (0.41, 0.74)        | 1.46e-05 |
| UK Bioank           | IVW                    | 93         | 0.62 (0.47, 0.81)        | 5.47e-04 |
|                     | Weighted median        |            | 0.56 (0.43, 0.74)        | 4.48e-05 |
|                     | Weighted mode          |            | 0.40 (0.18, 0.88)        | 0.026    |
|                     | MR-Egger               |            | 1.30 (0.43, 3.95)        | 0.041    |
|                     | MR-PRESSO (1 outlier)  |            | 0.55 (0.44, 0.69)        | 1.59e-06 |
| Life satisfaction   |                        |            |                          |          |
| FinnGen             | IVW                    | 68         | 0.56 (0.39, 0.82)        | 0.003    |
|                     | Weighted median        |            | 0.57 (0.36, 0.89)        | 0.015    |
|                     | Weighted mode          |            | 0.99 (0.31, 3.20)        | 0.99     |
|                     | MR-Egger               |            | 0.067 (0.010, 0.44)      | 0.006    |
|                     | MR-PRESSO (1 outlier)  |            | 0.53 (0.38, 0.74)        | 4.49e-04 |
| UK Bioank           | IVW                    | 68         | 0.56 (0.41, 0.76)        | 1.96e-04 |
|                     | Weighted median        |            | 0.42 (0.32, 0.57)        | 6.34e-09 |
|                     | Weighted mode          |            | 0.34 (0.17, 0.71)        | 0.005    |
|                     | MR-Egger               |            | 0.49 (0.11, 2.17)        | 0.35     |
|                     | MR-PRESSO (4 outliers) |            | 0.47 (0.37, 0.60)        | 4.37e-08 |
| Neuroticism         |                        |            |                          |          |
| FinnGen             | IVW                    | 122        | 1.41 (1.11, 1.79)        | 0.006    |
|                     | Weighted median        |            | 1.49 (1.13, 1.96)        | 0.005    |
|                     | Weighted mode          |            | 0.93 (0.40, 2.16)        | 0.87     |
|                     | MR-Egger               |            | 3.34 (1.10, 10.17)       | 0.035    |
|                     | MR-PRESSO (3 outliers) |            | 1.44 (1.16, 1.79)        | 0.001    |
| UK Bioank           | IVW                    | 124        | 1.52 (1.26, 1.83)        | 1.66e-05 |
|                     | Weighted median        |            | 1.71 (1.40, 2.08)        | 1.00e-07 |
|                     | Weighted mode          |            | 1.93 (1.08, 3.45)        | 0.027    |
|                     | MR-Egger               |            | 0.58 (0.27, 1.25)        | 0.17     |
|                     | MR-PRESSO (7 outliers) |            | 1.77 (1.53, 2.06)        | 1.06e-11 |
| Depressive symptoms |                        |            |                          |          |
| FinnGen             | IVW                    | 114        | 1.59 (1.09, 2.33)        | 0.017    |
|                     | Weighted median        |            | 1.48 (0.94, 2.32)        | 0.088    |
|                     | Weighted mode          |            | 1.03 (0.32, 3.38)        | 0.96     |
|                     | MR-Egger               |            | 7.77 (1.40, 43.17)       | 0.021    |
|                     | MR-PRESSO (4 outliers) |            | 1.84 (1.32, 2.57)        | 5.08e-04 |
| UK Bioank           | IVW                    | 116        | 2.20 (1.64, 2.97)        | 1.99e-07 |
|                     | Weighted median        |            | 2.35 (1.73, 3.18)        | 4.10e-08 |
|                     | Weighted mode          |            | 2.74 (1.23, 6.13)        | 0.015    |
|                     | MR-Egger               |            | 2.49 (0.71, 8.77)        | 0.16     |
|                     | MR-PRESSO (5 outliers) |            | 2.69 (2.11, 3.44)        | 1.83e-12 |
| MDD                 |                        |            |                          |          |
| FinnGen             | IVW                    | 47         | 1.26 (1.09, 1.45)        | 0.001    |
|                     | Weighted median        |            | 1.24 (1.05, 1.46)        | 0.010    |
|                     | Weighted mode          |            | 1.19 (0.88, 1.60)        | 0.28     |

|           |                        |    |                    |          |
|-----------|------------------------|----|--------------------|----------|
|           | MR-Egger               |    | 1.56 (0.67, 3.61)  | 0.31     |
|           | MR-PRESSO (2 outliers) |    | 1.23 (1.08, 1.39)  | 0.002    |
| UK Bioank | IVW                    | 44 | 1.37 (1.23, 1.52)  | 1.28e-08 |
|           | Weighted median        |    | 1.26 (1.12, 1.41)  | 1.30e-04 |
|           | Weighted mode          |    | 1.20 (0.93, 1.55)  | 0.18     |
|           | MR-Egger               |    | 0.73 (0.43, 1.25)  | 0.26     |
|           | MR-PRESSO (2 outliers) |    | 1..41 (1.28, 1.55) | 9.73e-10 |
| BMI       |                        |    |                    |          |
| FinnGen   | IVW                    | 67 | 1.64 (1.41, 1.90)  | 6.45e-11 |
|           | Weighted median        |    | 1..63 (1.38, 1.93) | 1.51e-08 |
|           | Weighted mode          |    | 1.61 (1.19, 2.18)  | 0.003    |
|           | MR-Egger               |    | 1.21 (0.78, 1.88)  | 0.39     |
|           | MR-PRESSO (1 outlier)  |    | 1.72 (1.51, 1.97)  | 2.68e-11 |
| UK Bioank | IVW                    | 68 | 1.62 (1.42, 1.86)  | 2.54e-12 |
|           | Weighted median        |    | 1.59 (1.42, 1.78)  | 6.09e-16 |
|           | Weighted mode          |    | 1.64 (1.39, 1.93)  | 1.47e-07 |
|           | MR-Egger               |    | 1.12 (0.76, 1.65)  | 0.58     |
|           | MR-PRESSO (8 outliers) |    | 1.60 (1.45, 1.75)  | 4.60e-14 |
| WHR       |                        |    |                    |          |
| FinnGen   | IVW                    | 28 | 2.06 (1.65, 2.58)  | 2.07e-10 |
|           | Weighted median        |    | 2.01 (1.56, 2.58)  | 4.69e-08 |
|           | Weighted mode          |    | 1.72 (0.88, 3.37)  | 0.13     |
|           | MR-Egger               |    | 3.67 (1.35, 9.92)  | 0.017    |
|           | MR-PRESSO (2 outliers) |    | 1.93 (1.60, 2.33)  | 2.35e-07 |
| UK Bioank | IVW                    | 28 | 1.69 (1.34, 2.14)  | 1.07e-05 |
|           | Weighted median        |    | 1.69 (1.39, 2.05)  | 9.17e-08 |
|           | Weighted mode          |    | 1.99 (1.30, 3.05)  | 0.004    |
|           | MR-Egger               |    | 1.19 (0.40, 3.55)  | 0.76     |
|           | MR-PRESSO (4 outliers) |    | 1.63 (1.38, 1.92)  | 7.04e-06 |
| WC        |                        |    |                    |          |
| FinnGen   | IVW                    | 40 | 1.66 (1.39, 1.99)  | 2.58e-08 |
|           | Weighted median        |    | 1.57 (1.29, 1.92)  | 7.87e-06 |
|           | Weighted mode          |    | 1.54 (1.09, 2.19)  | 0.019    |
|           | MR-Egger               |    | 1.75 (0.92, 3.31)  | 0.095    |
|           | MR-PRESSO (2 outliers) |    | 1.82 (1.58, 2.10)  | 4.70e-10 |
| UK Bioank | IVW                    | 41 | 1.62 (1.34, 1.96)  | 8.02e-07 |
|           | Weighted median        |    | 1.67 (1.46, 1.92)  | 1.09e-13 |
|           | Weighted mode          |    | 1.69 (1.37, 2.09)  | 1.42e-05 |
|           | MR-Egger               |    | 1.95 (0.98, 3.86)  | 0.064    |
|           | MR-PRESSO (7 outliers) |    | 1.62 (1.45, 1.81)  | 5.88e-10 |
| HC        |                        |    |                    |          |
| FinnGen   | IVW                    | 51 | 1.41 (1.18, 1.68)  | 1.25e-04 |
|           | Weighted median        |    | 1.42 (1.18, 1.70)  | 1.55e-04 |
|           | Weighted mode          |    | 1.39 (1.01, 1.90)  | 0.048    |
|           | MR-Egger               |    | 2.50 (1.52, 4.12)  | 7.75e-04 |
|           | MR-PRESSO (3 outliers) |    | 1.40 (1.18, 1.65)  | 2.49e-04 |
| UK Bioank | IVW                    | 52 | 1.38 (1.19, 1.60)  | 2.00e-05 |
|           | Weighted median        |    | 1.53 (1.35, 1.73)  | 1.11e-11 |
|           | Weighted mode          |    | 1.58 (1.38, 1.81)  | 1.75e-08 |
|           | MR-Egger               |    | 2.29 (1.49, 3.51)  | 3.92e-04 |
|           | MR-PRESSO (6 outliers) |    | 1.46 (1.31, 1.63)  | 2.75e-08 |

<sup>a</sup> Indicates the odds for hypertension associated with each psychological well-being



indicator or each 1-SD increase in each adiposity trait.

Abbreviations: BMI, body mass index; CI, confidence interval; HC, hip circumference; IVW, inverse-variance weighted; MDD, major depressive disorder; OR, odds ratio; PRESSO, pleiotropy residual sum and outlier; SD, standard deviation; SNP, single nucleotide polymorphism; UVMR, univariable Mendelian randomization; WC, waist circumference; WHR, waist-to-hip ratio.

**Supplementary Table S13. MVMR estimates for the causal association between each mediator and hypertension with adjustment for relative carbohydrate intake**

| Mediator            | Outcome    | Method     | OR (95% CI) <sup>a</sup> | P value  | No. of SNP | Instrumental validity test |             |          | Heterogeneity test |          | Directional pleiotropy test |       |         |
|---------------------|------------|------------|--------------------------|----------|------------|----------------------------|-------------|----------|--------------------|----------|-----------------------------|-------|---------|
|                     |            |            |                          |          |            | F statistic                | Q statistic | P value  | Q statistic        | P value  | Egger intercept             | SE    | P value |
| Positive affect     | FinnGen    | MV-IVW     | 0.53 (0.39, 0.74)        | 1.26e-04 | 98         | 37                         | 153.75      | 1.29e-04 | 156.52             | 9.46e-05 | 0.002                       | 0.002 | 0.47    |
|                     |            | MVMR Egger | 0.54 (0.39, 0.74)        | 1.45e-04 |            |                            |             |          |                    |          |                             |       |         |
|                     | UK Biobank | MV-IVW     | 0.58 (0.44, 0.77)        | 1.32e-04 | 98         | 37                         | 272.22      | 5.22e-19 | 280.35             | 6.01e-20 | 0.001                       | 0.002 | 0.76    |
|                     |            | MVMR Egger | 0.58 (0.44, 0.77)        | 1.45e-04 |            |                            |             |          |                    |          |                             |       |         |
| Life satisfaction   | FinnGen    | MV-IVW     | 0.57 (0.39, 0.83)        | 0.003    | 74         | 36                         | 120.56      | 2.22e-04 | 124.64             | 1.18e-04 | 0.002                       | 0.002 | 0.47    |
|                     |            | MVMR Egger | 0.56 (0.39, 0.82)        | 0.003    |            |                            |             |          |                    |          |                             |       |         |
|                     | UK Biobank | MV-IVW     | 0.55 (0.40, 0.77)        | 3.89e-04 | 74         | 36                         | 221.41      | 2.32e-17 | 229.78             | 2.27e-18 | 0.001                       | 0.002 | 0.57    |
|                     |            | MVMR Egger | 0.55 (0.39, 0.76)        | 3.65e-04 |            |                            |             |          |                    |          |                             |       |         |
| Neuroticism         | FinnGen    | MV-IVW     | 1.43 (1.12, 1.83)        | 0.005    | 126        | 39                         | 231.49      | 1.19e-08 | 234.41             | 8.13e-09 | 0.003                       | 0.002 | 0.19    |
|                     |            | MVMR Egger | 1.43 (1.12, 1.84)        | 0.004    |            |                            |             |          |                    |          |                             |       |         |
|                     | UK Biobank | MV-IVW     | 1.55 (1.27, 1.88)        | 1.21e-05 | 128        | 39                         | 358.78      | 1.91e-24 | 377.07             | 7.39e-27 | 0.002                       | 0.002 | 0.12    |
|                     |            | MVMR Egger | 1.56 (1.28, 1.89)        | 7.75e-06 |            |                            |             |          |                    |          |                             |       |         |
| Depressive symptoms | FinnGen    | MV-IVW     | 1.62 (1.10, 2.39)        | 0.014    | 118        | 39                         | 210.09      | 1.53e-07 | 213.28             | 9.86e-08 | 0.002                       | 0.005 | 0.97    |
|                     |            | MVMR Egger | 1.59 (1.09, 2.33)        | 0.017    |            |                            |             |          |                    |          |                             |       |         |
|                     | UK Biobank | MV-IVW     | 2.32 (1.71, 3.13)        | 4.92e-08 | 120        | 39                         | 316.14      | 3.10e-20 | 326.36             | 1.93e-21 | 0.002                       | 0.002 | 0.18    |
|                     |            | MVMR Egger | 2.30 (1.70, 3.11)        | 5.66e-08 |            |                            |             |          |                    |          |                             |       |         |
| MDD                 | FinnGen    | MV-IVW     | 1.25 (1.07, 1.46)        | 0.005    | 51         | 33                         | 94.11       | 7.91e-05 | 97.26              | 4.95e-05 | 0.005                       | 0.003 | 0.23    |
|                     |            | MVMR Egger | 1.28 (1.10, 1.48)        | 0.001    |            |                            |             |          |                    |          |                             |       |         |
|                     |            | MV-IVW     | 1.38 (1.22, 1.56)        | 3.36e-07 | 51         | 33                         | 145.76      | 8.64e-12 | 152.72             | 1.38e-12 | 0.003                       | 0.002 | 0.28    |

|     |            |            |                   |          |    |    |        |          |        |          |        |       |      |
|-----|------------|------------|-------------------|----------|----|----|--------|----------|--------|----------|--------|-------|------|
|     | UK Biobank | MVMR Egger | 1.40 (1.23, 1.58) | 1.80e-07 |    |    |        |          |        |          |        |       |      |
| BMI | FinnGen    | MV-IVW     | 1.64 (1.43, 1.89) | 3.48e-12 | 70 | 43 | 140.05 | 4.40e-07 | 146.68 | 1.04e-07 | 0.000  | 0.003 | 0.90 |
|     |            | MVMR Egger | 1.64 (1.43, 1.90) | 7.93e-12 |    |    |        |          |        |          |        |       |      |
|     | UK Biobank | MV-IVW     | 1.58 (1.39, 1.80) | 7.34e-12 | 71 | 44 | 298.60 | 1.18e-30 | 322.50 | 2.08e-34 | -0.002 | 0.003 | 0.52 |
|     |            | MVMR Egger | 1.59 (1.39, 1.82) | 8.19e-12 |    |    |        |          |        |          |        |       |      |
| WHR | FinnGen    | MV-IVW     | 1.98 (1.57, 2.50) | 8.00e-09 | 33 | 29 | 58.26  | 0.001    | 63.59  | 4.99e-04 | 0.003  | 0.004 | 0.36 |
|     |            | MVMR Egger | 1.95 (1.54, 2.47) | 3.02e-08 |    |    |        |          |        |          |        |       |      |
|     | UK Biobank | MV-IVW     | 1.68 (1.30, 2.16) | 5.69e-05 | 33 | 28 | 156.40 | 4.87e-19 | 172.02 | 1.79e-21 | 0.003  | 0.004 | 0.40 |
|     |            | MVMR Egger | 1.65 (1.28, 2.13) | 1.17e-04 |    |    |        |          |        |          |        |       |      |
| WC  | FinnGen    | MV-IVW     | 1.71 (1.44, 2.03) | 5.71e-10 | 45 | 37 | 87.64  | 4.66e-05 | 92.50  | 1.77e-05 | 0.001  | 0.004 | 0.79 |
|     |            | MVMR Egger | 1.70 (1.42, 2.03) | 5.72e-09 |    |    |        |          |        |          |        |       |      |
|     | UK Biobank | MV-IVW     | 1.60 (1.33, 1.92) | 4.90e-07 | 46 | 38 | 237.08 | 1.18e-28 | 255.68 | 1.23e-31 | 0.000  | 0.004 | 0.97 |
|     |            | MVMR Egger | 1.60 (1.32, 1.94) | 2.15e-06 |    |    |        |          |        |          |        |       |      |
| HC  | FinnGen    | MV-IVW     | 1.40 (1.17, 1.67) | 2.15e-04 | 56 | 40 | 155.64 | 4.99e-12 | 161.14 | 1.35e-12 | 0.005  | 0.004 | 0.15 |
|     |            | MVMR Egger | 1.37 (1.15, 1.63) | 5.43e-04 |    |    |        |          |        |          |        |       |      |
|     | UK Biobank | MV-IVW     | 1.38 (1.19, 1.61) | 3.96e-05 | 57 | 41 | 287.83 | 1.23e-33 | 299.41 | 1.47e-35 | 0.004  | 0.003 | 0.24 |
|     |            | MVMR Egger | 1.36 (1.16, 1.59) | 1.24e-04 |    |    |        |          |        |          |        |       |      |

<sup>a</sup> Indicates the odds for hypertension associated with each psychological well-being indicator or each 1-SD increase in each adiposity trait.

Abbreviations: BMI, body mass index; CI, confidence interval; HC, hip circumference; MDD, major depressive disorder; MV-IVW, multivariable inverse-variance weighted; MVMR Egger, multivariable Mendelian randomization Egger; OR, odds ratio; SD, standard deviation; SNP, single nucleotide polymorphism.; WC, waist circumference; WHR, waist-to-hip ratio.

### Supplementary Figure S1. Flow chart of the present MR study

Abbreviations: BF%, body fat percentage; BMI, body mass index; GIANT, Genetic Investigation of ANthropometric Traits; HC, hip circumference; IV, instrumental variable; IVW, inverse-variance weighted; MDD, major depressive disorder; MR, Mendelian randomization; MVMR, multivariable Mendelian randomization; PGC, Psychiatric Genomic Consortium; PRESSO, pleiotropy residual sum and outlier; SNP, single nucleotide polymorphism; UVMR, univariable Mendelian randomization; WC, waist circumference; WHR, waist-to-hip ratio.

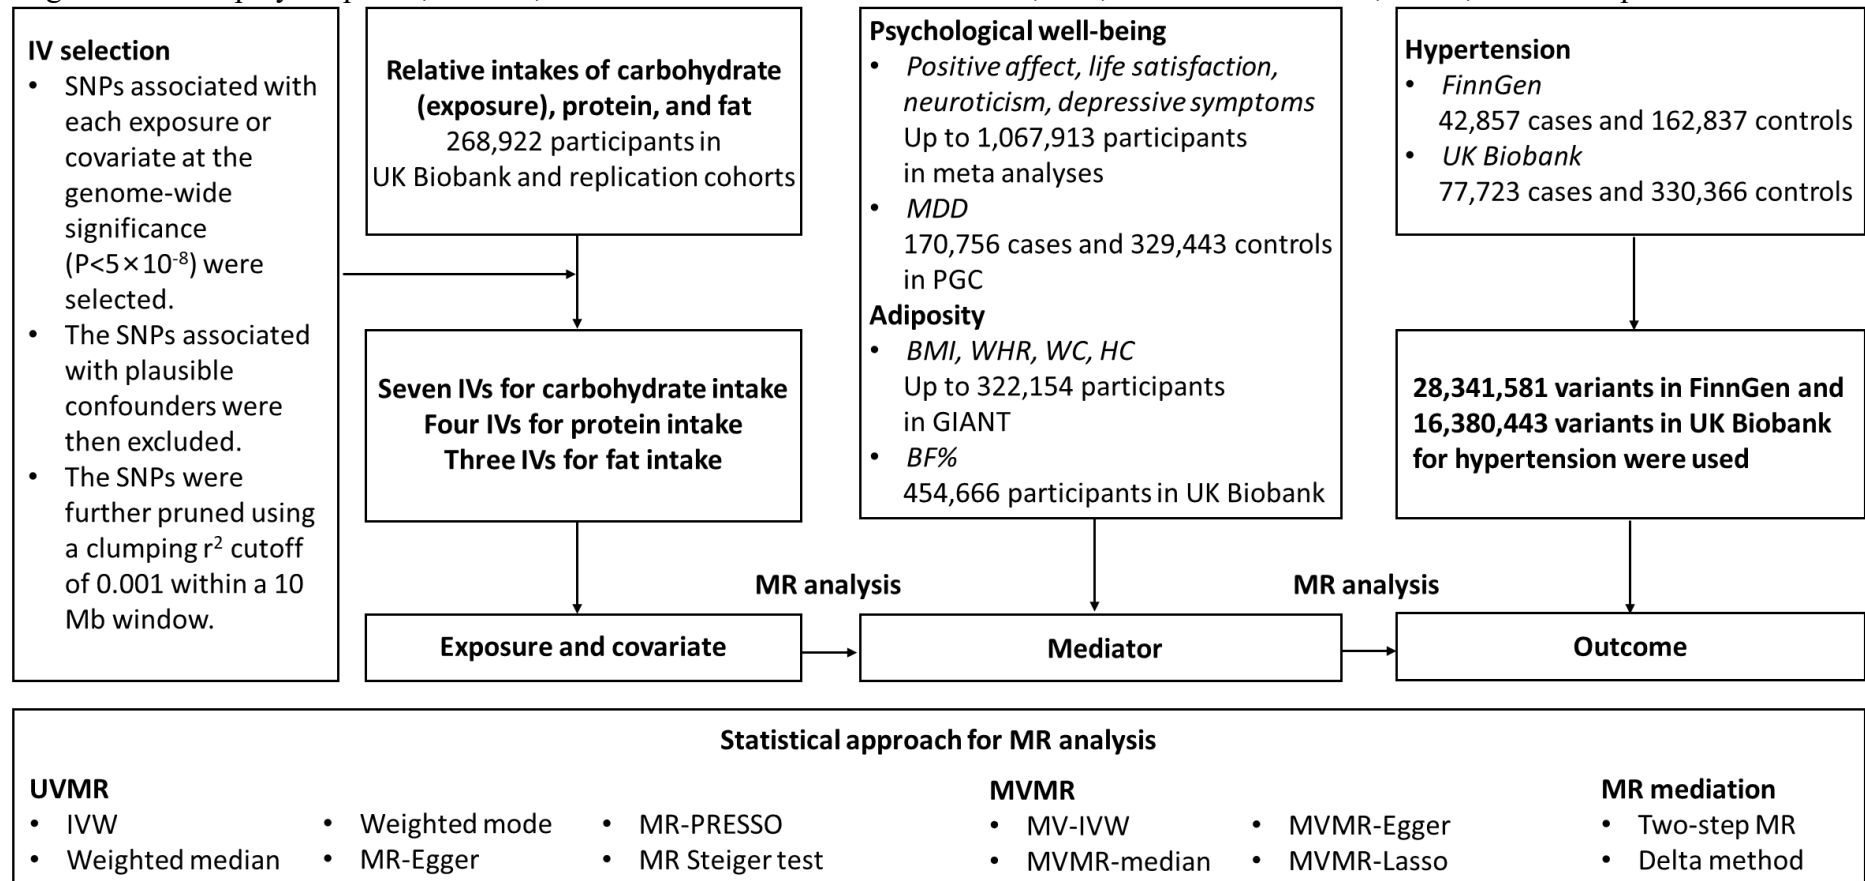

Supplement: s1 [file s1]
